# Supplementary material for: A comprehensive investigation of MoO3based resistive random access memory
Source: Royal Society of Chemistry journal article supplement (doi:10.1039/d0ra03415k), 2020-01-01
Supplement: d0ra03415k1.pdf [file d0ra03415k1.pdf]

# A Comprehensive Investigation of $\text{MoO}_3$ based Resistive Random Access Memory

## Supplementary Information

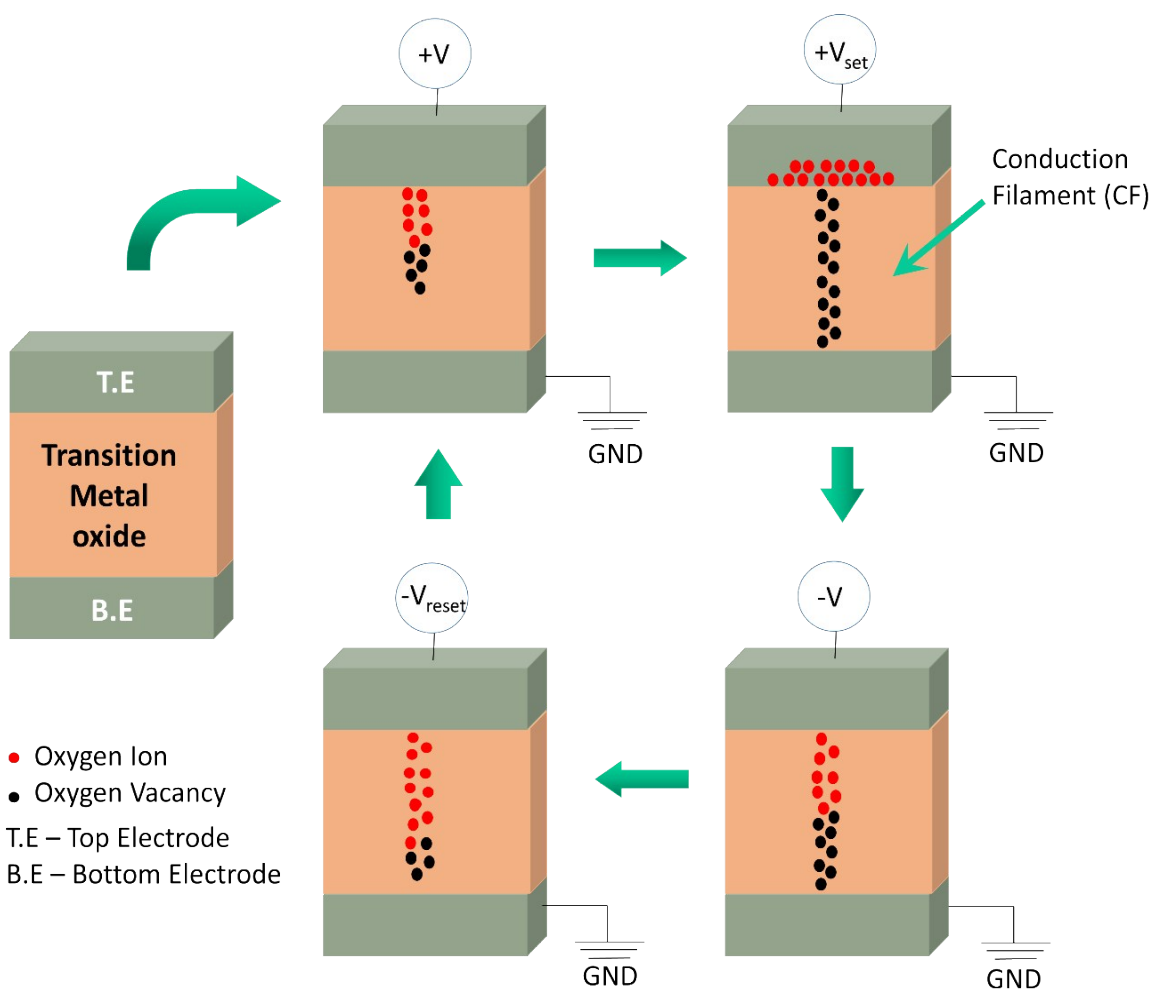

**Figure S1** Schematic illustration of bipolar switching mechanism in MIM structure behaving as RRAM

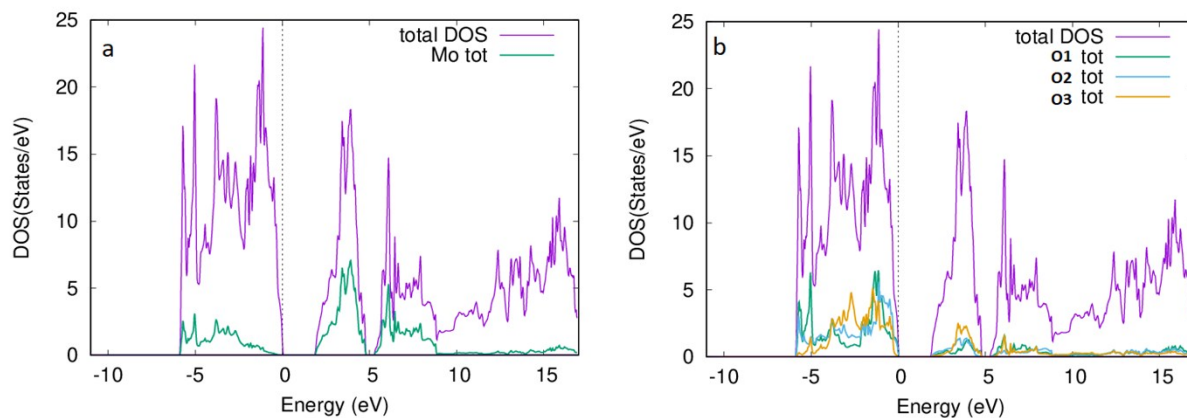

**Figure S2** Density of states for molybdenum oxide (MoO<sub>3</sub>) in unit cell

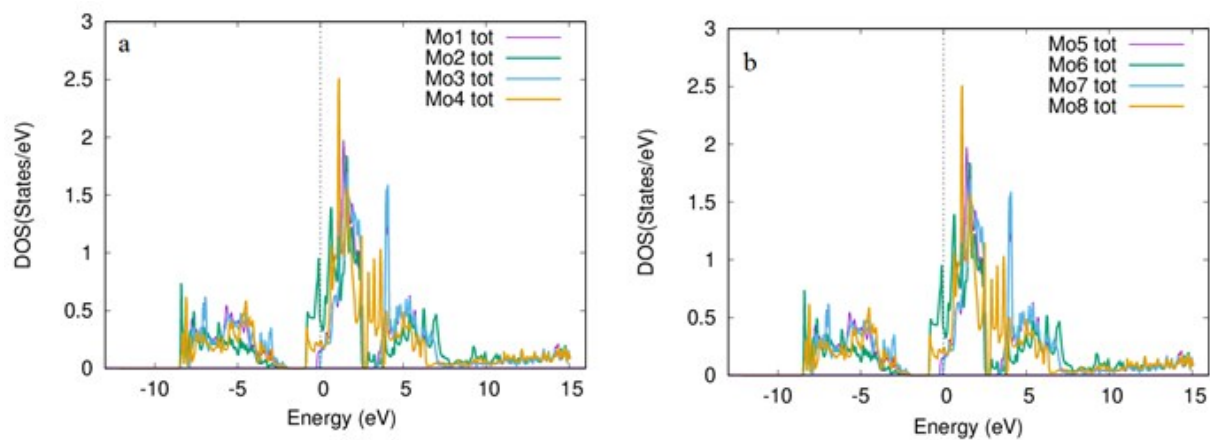

**Figure S3** Total Density of states for Mo in Vacancy 1 structure of molybdenum oxide (MoO<sub>3</sub>) supercell

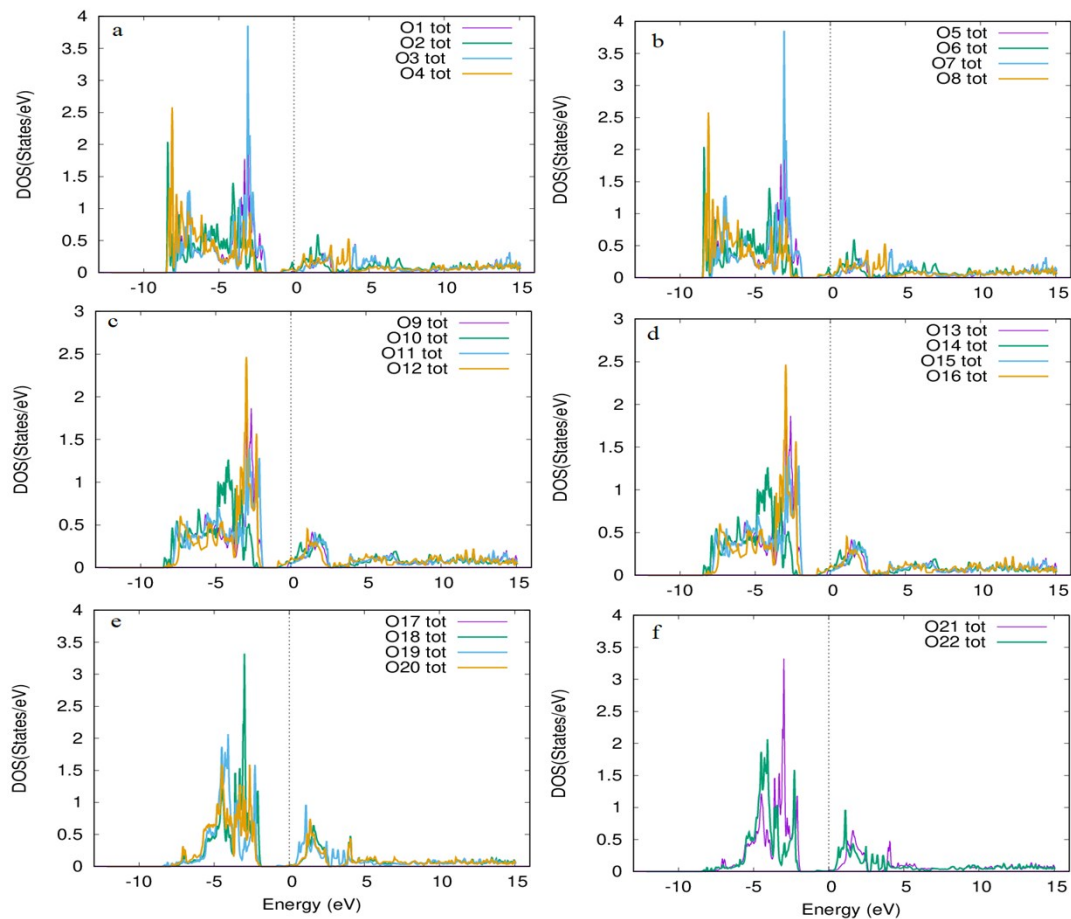

**Figure S4** Total Density of states for O in Vacancy 1 structure of molybdenum oxide ( $\text{MoO}_3$ ) supercell

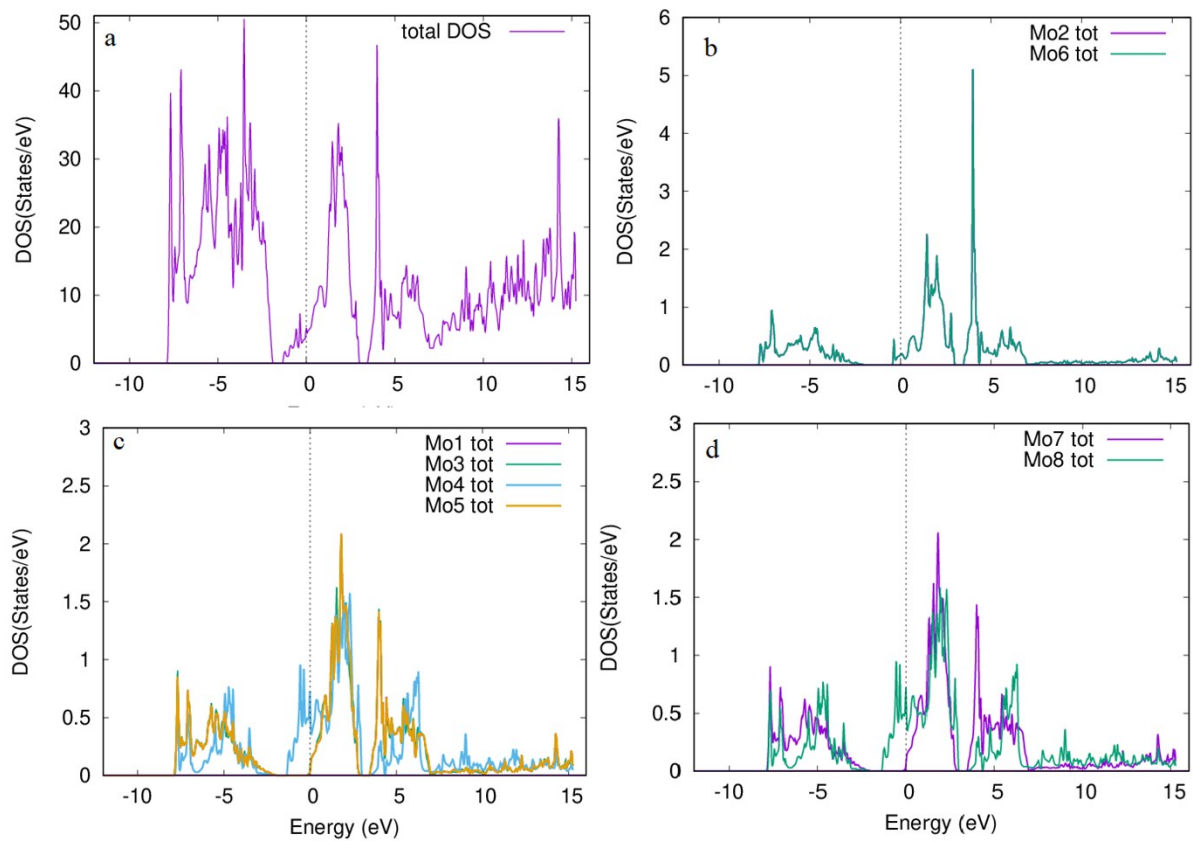

**Figure S5** Total Density of states for Mo in Vacancy 2 structure of molybdenum oxide ( $\text{MoO}_3$ ) supercell

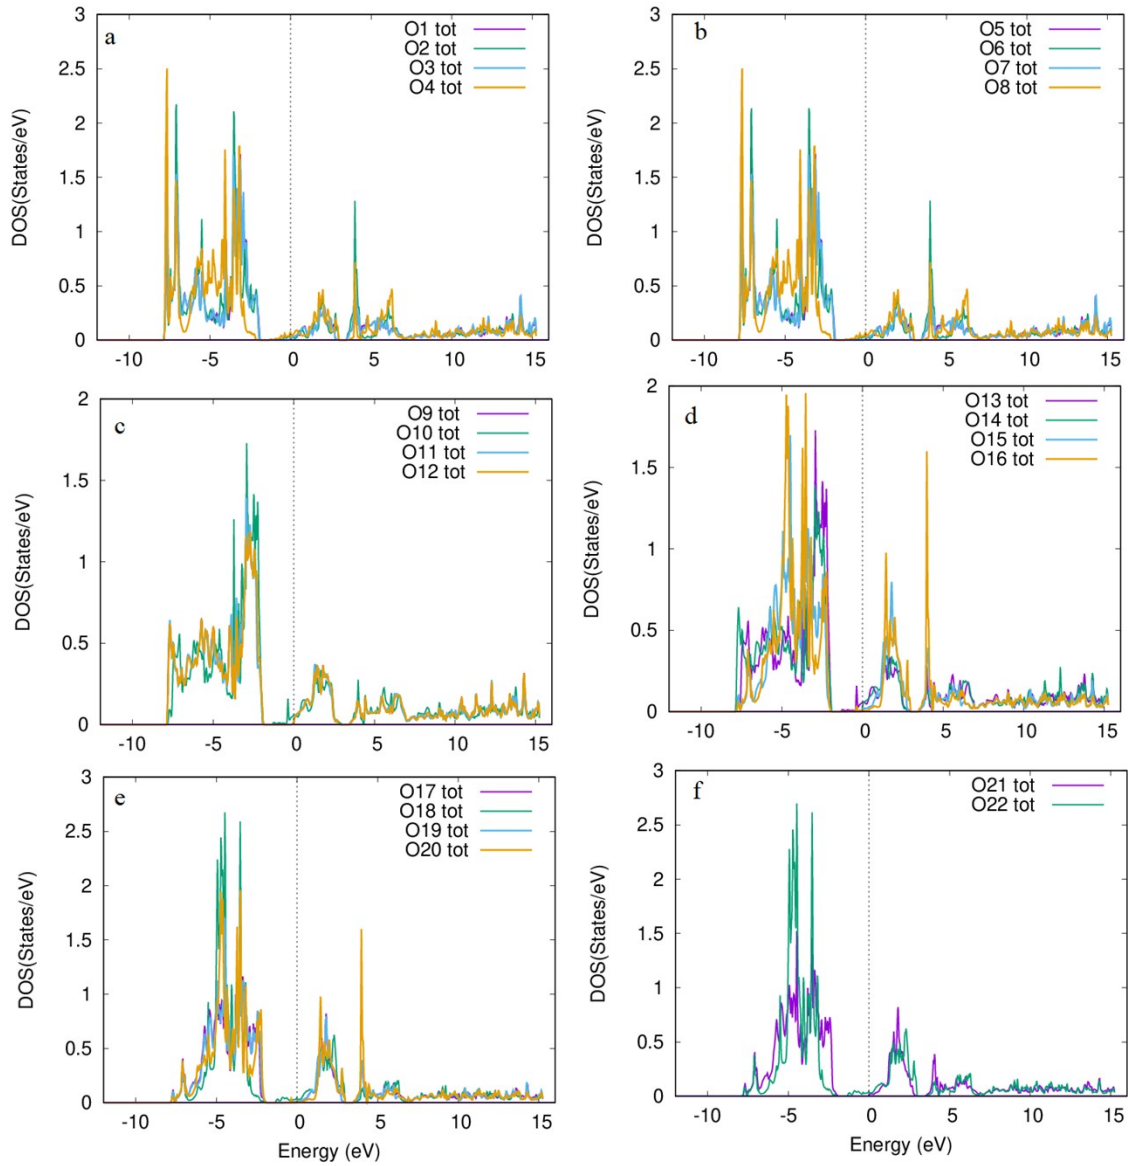

**Figure S6** Total Density of states for O in Vacancy 2 structure of molybdenum oxide ( $\text{MoO}_3$ ) supercell

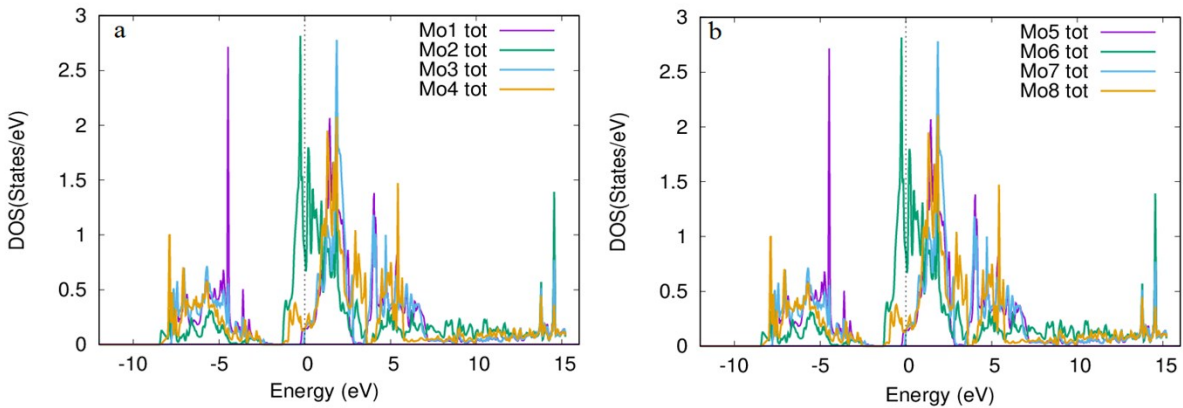

**Figure S7** Total Density of states for Mo in Vacancy 3 structure of molybdenum oxide ( $\text{MoO}_3$ ) supercell

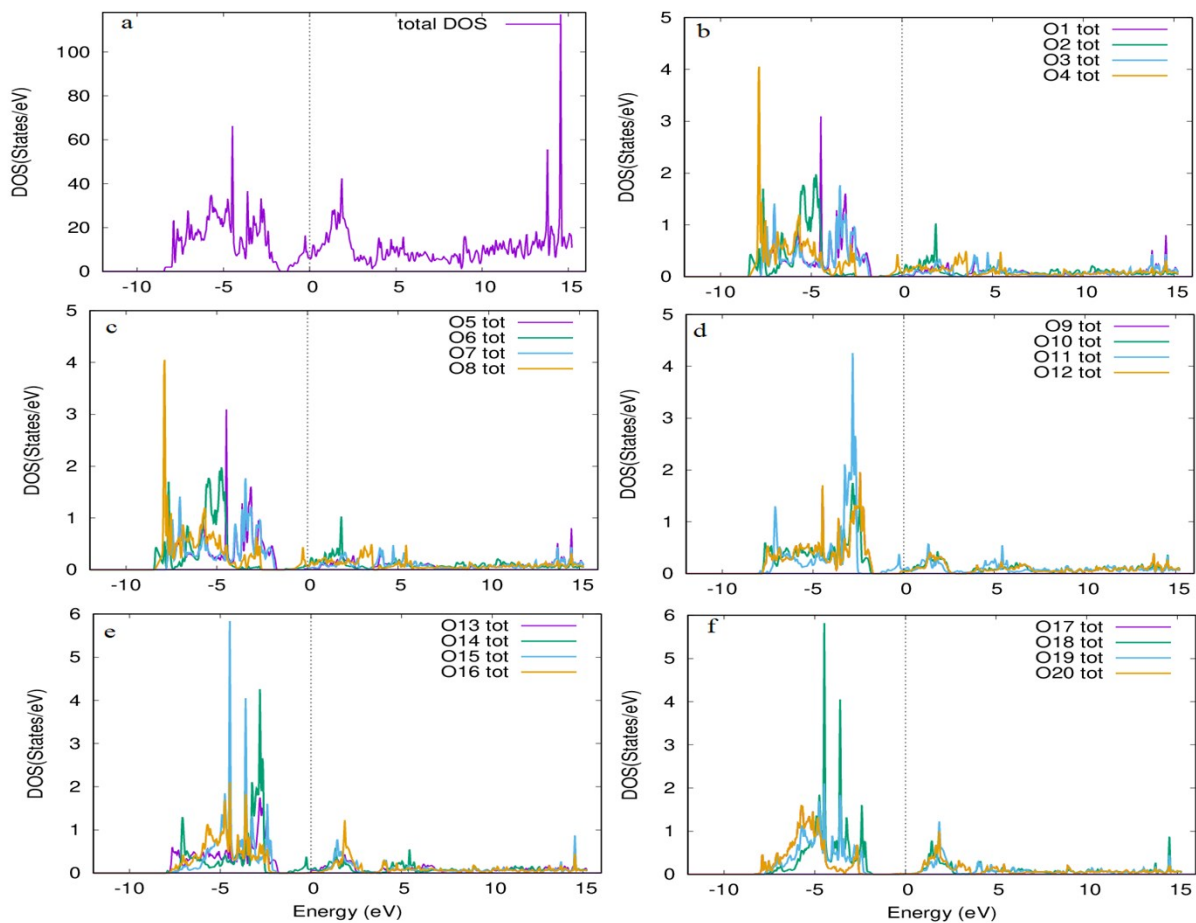

**Figure S8** Total Density of states for O in Vacancy 3 structure of molybdenum oxide ( $\text{MoO}_3$ ) supercell

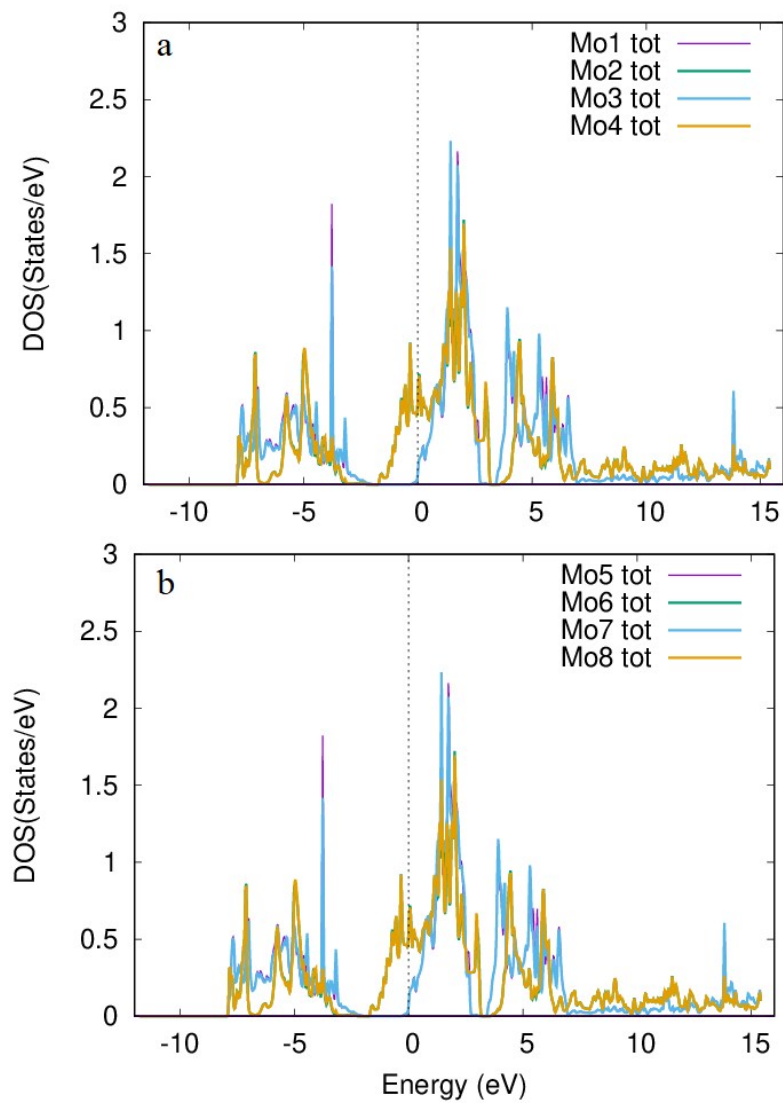

**Figure S9** Total Density of states for Mo in Vacancy 14 structure of molybdenum oxide ( $\text{MoO}_3$ ) supercell

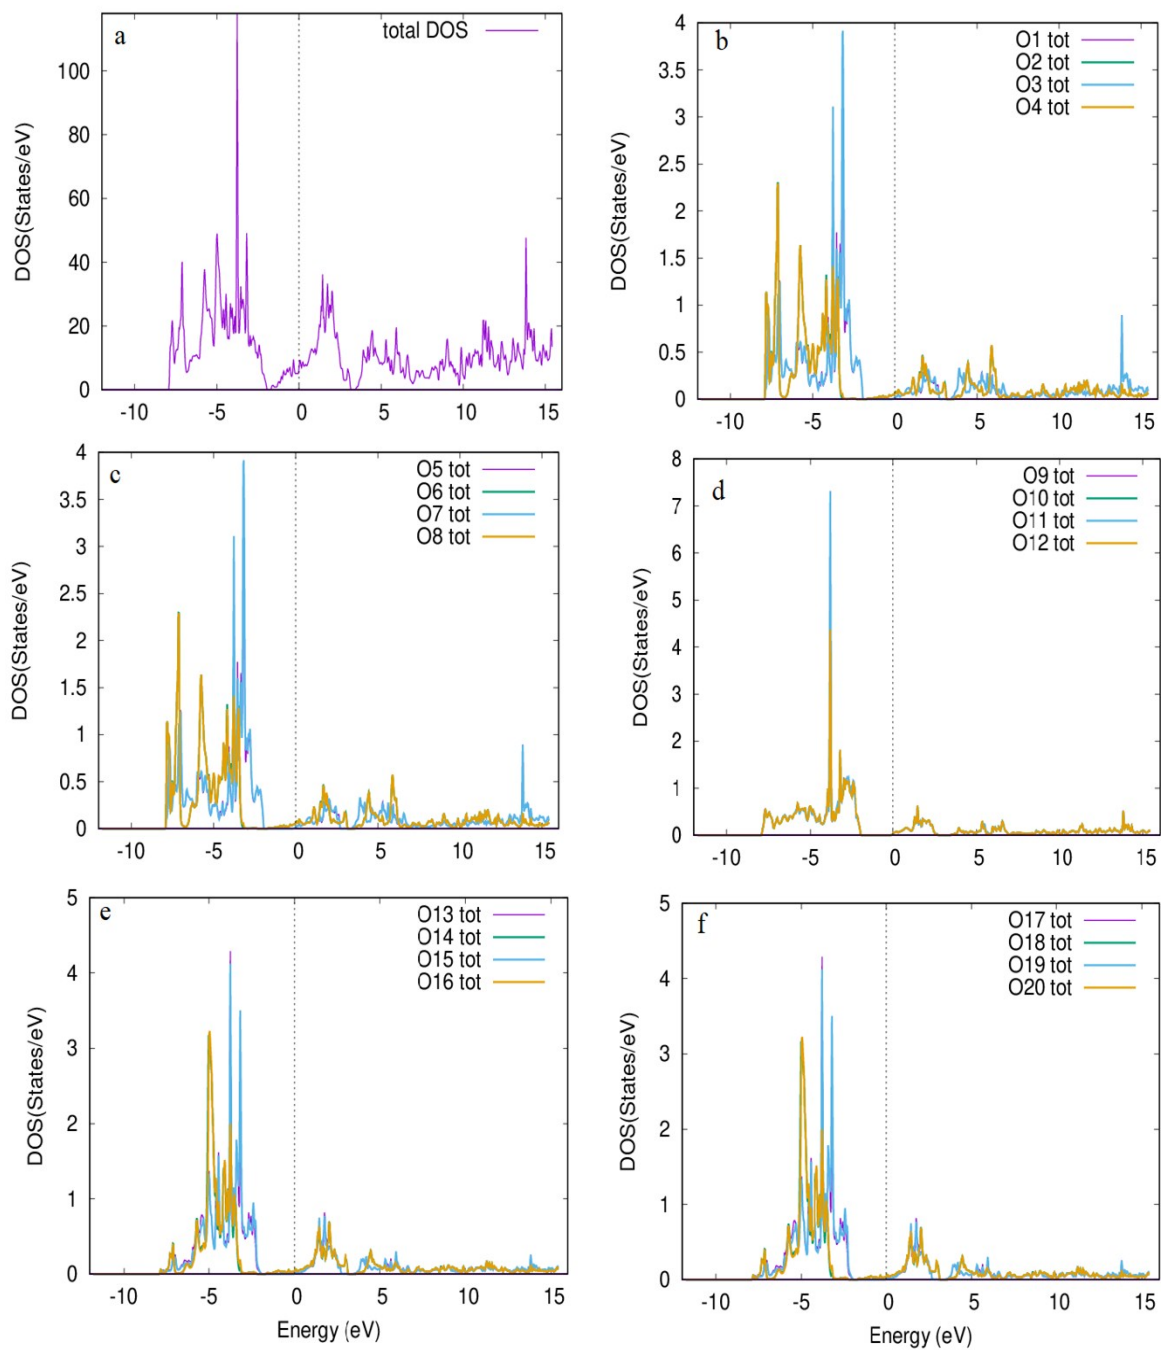

**Figure S10** Total Density of states for O in Vacancy 4 structure of molybdenum oxide ( $\text{MoO}_3$ ) supercell



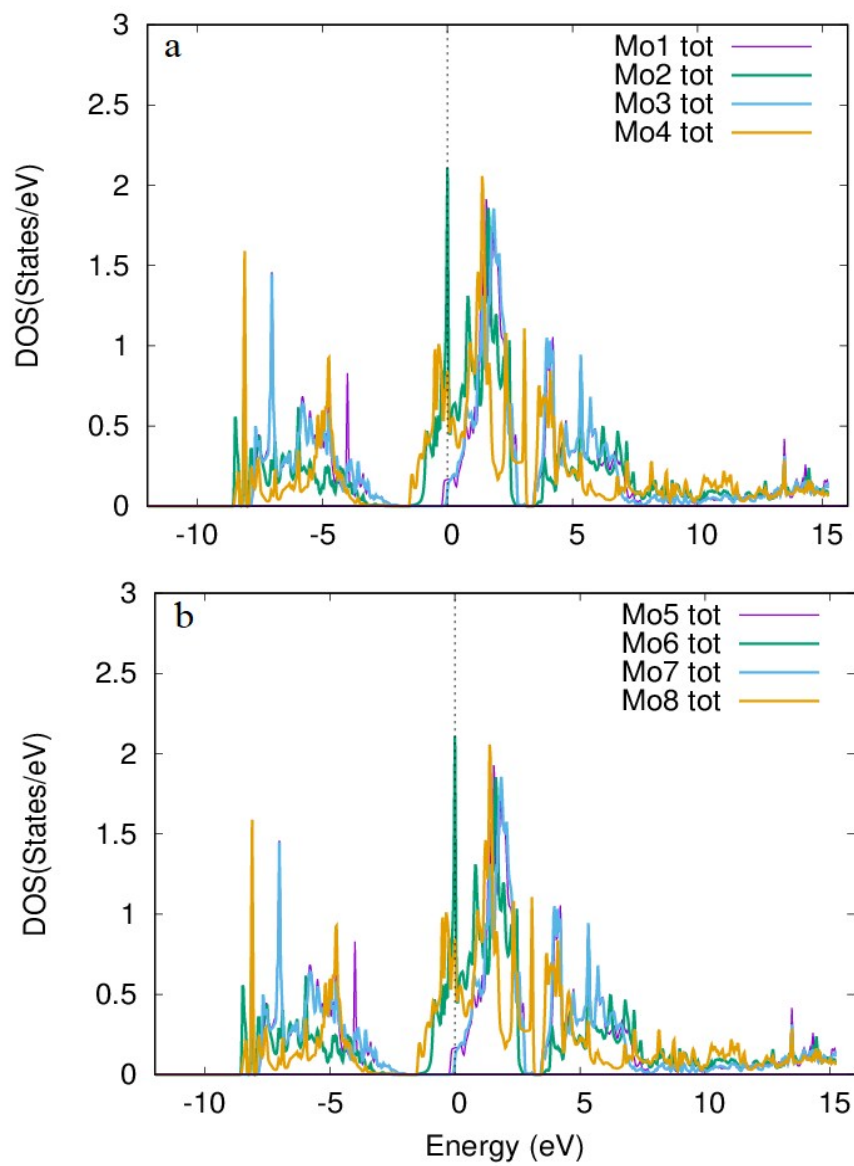

**Figure S11** Total Density of states for Mo in Vacancy 5 structure of molybdenum oxide (MoO<sub>3</sub>) supercell

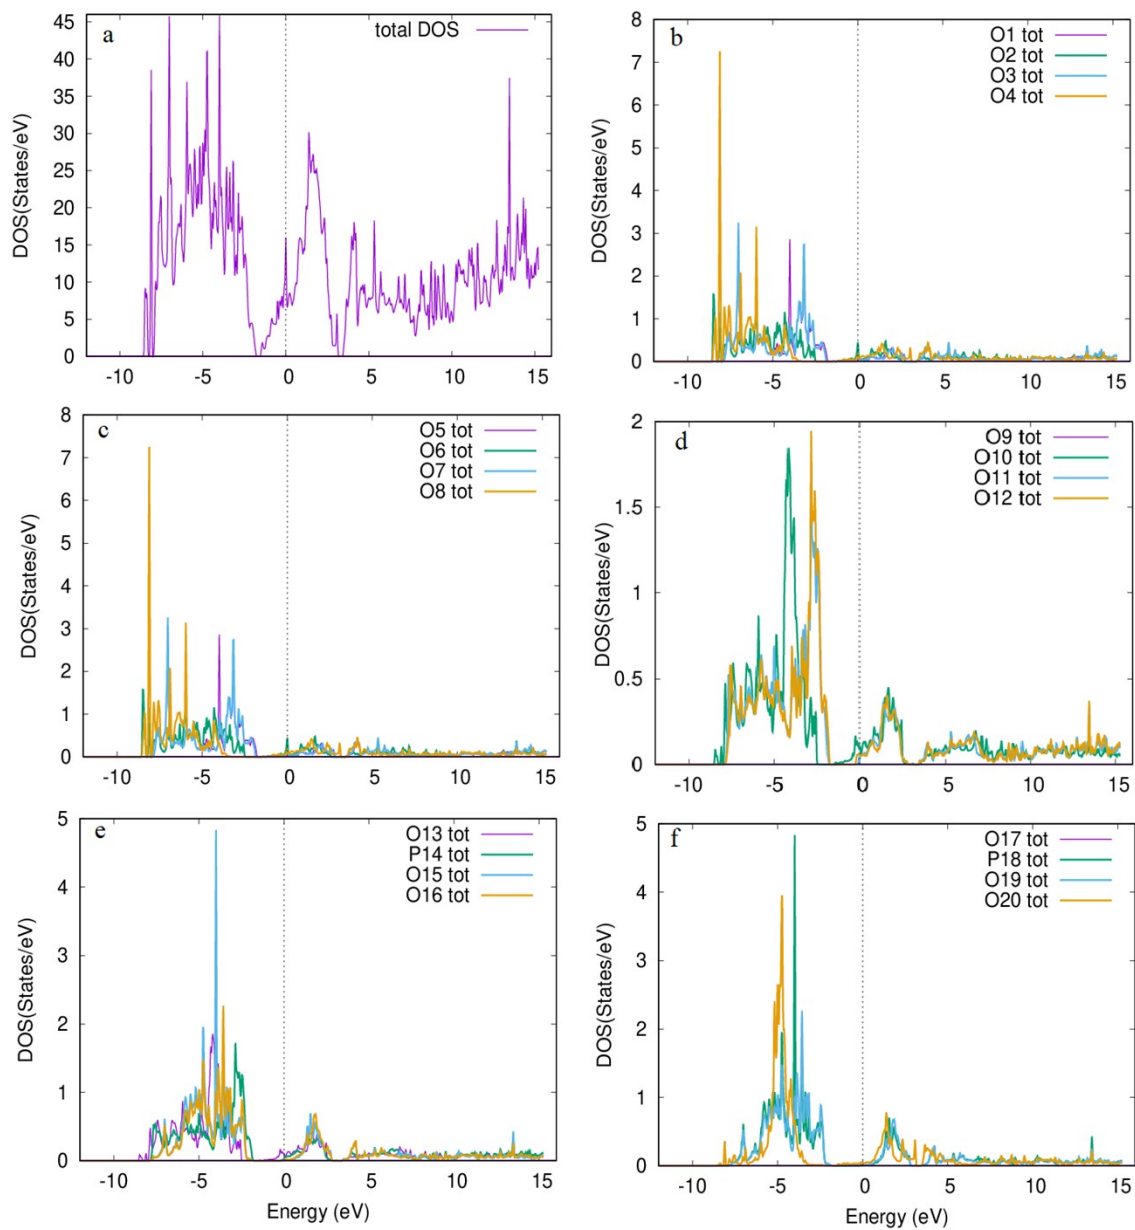

**Figure S12** Total Density of states for O in Vacancy 5 structure of molybdenum trioxide ( $\text{MoO}_3$ ) supercell
